# Supplementary material for: β‐catenin signaling modulates the tempo of dendritic growth of adult‐born hippocampal neurons
Source: PubMed Central journal article supplement (PMC7604596; doi:10.15252/embj.2020104472), 2020-09-15
Supplement: EMBJ-39-e104472-s001.pdf [file EMBJ-39-e104472-s001.pdf]

Appendix to:

## **$\beta$ -catenin signaling modulates the tempo of dendritic growth of adult-born hippocampal neurons**

Jana Heppt<sup>1</sup>, Marie-Theres Wittmann<sup>1,2</sup>, Iris Schöffner<sup>1</sup>, Charlotte Billmann<sup>1</sup>, Jingzhong Zhang<sup>3,4</sup>, Daniela Vogt-Weisenhorn<sup>3</sup>, Nilima Prakash<sup>3,5</sup>, Wolfgang Wurst<sup>3</sup>, Makoto Mark Taketo<sup>6</sup>, D. Chichung Lie<sup>1#</sup>

### **content:**

Appendix Figure S1: Potential regulators of canonical Wnt signaling during adult neurogenesis

**A**

Wnt/ $\beta$ -catenin signaling

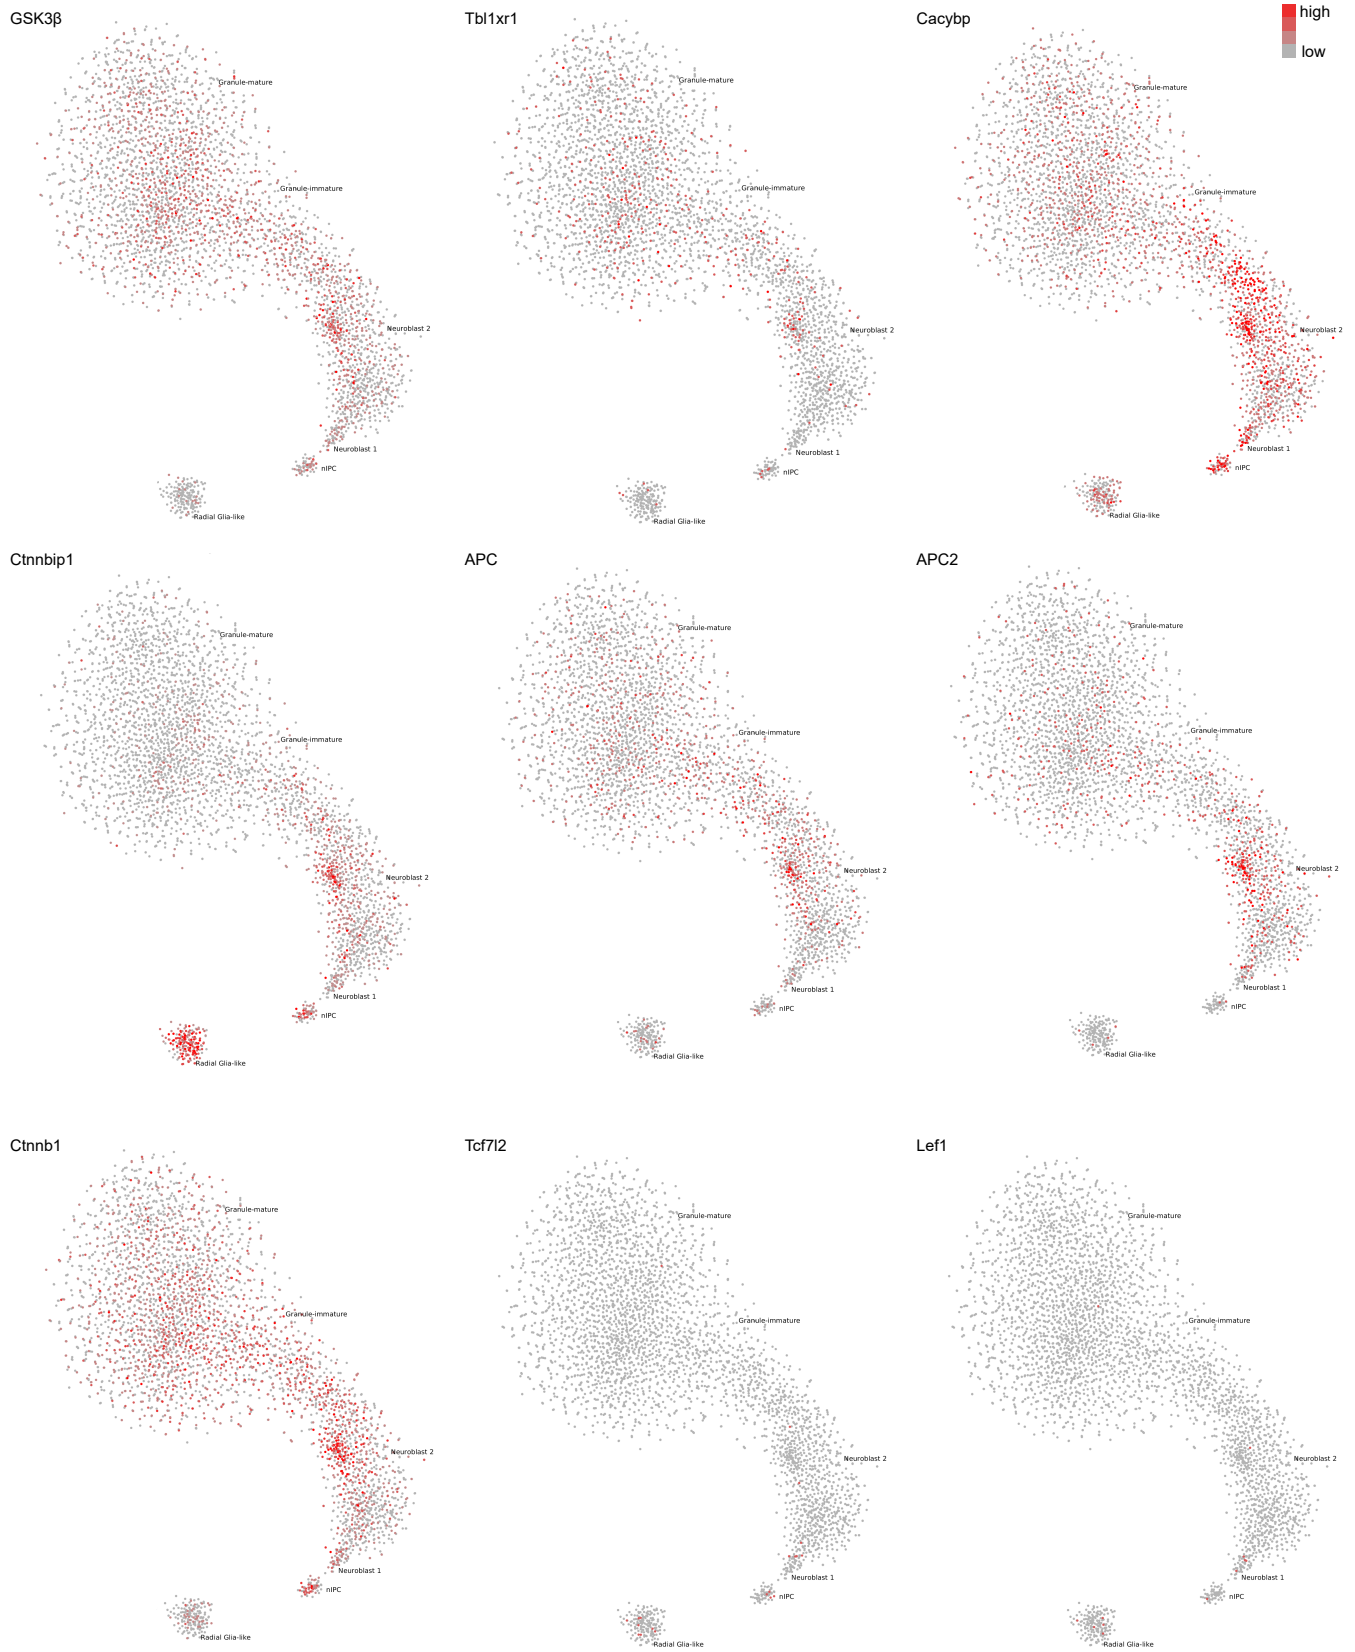

Wnt/PCP signaling

Celsr1

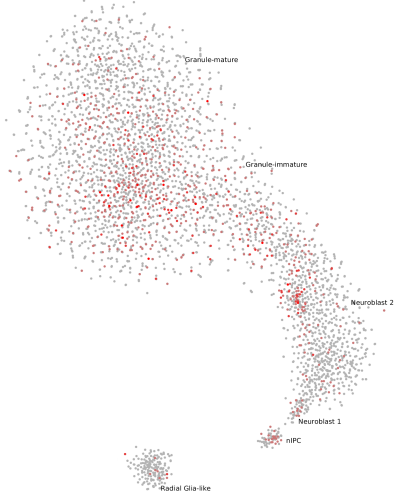

Atp6ap2

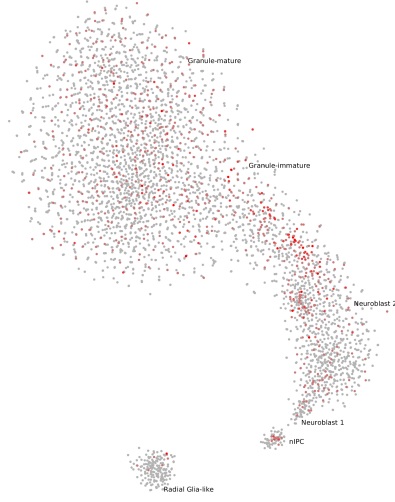

Rac3

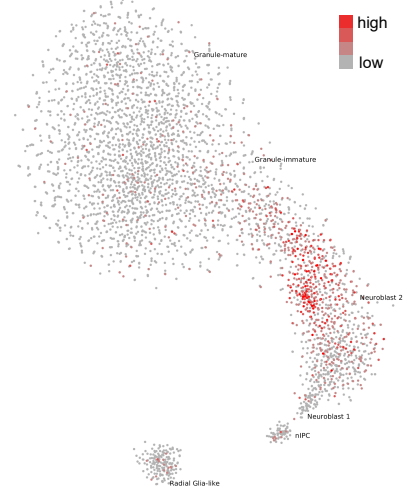

Prickle1

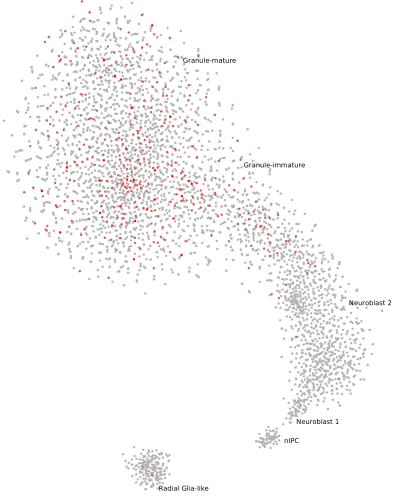

Rock2

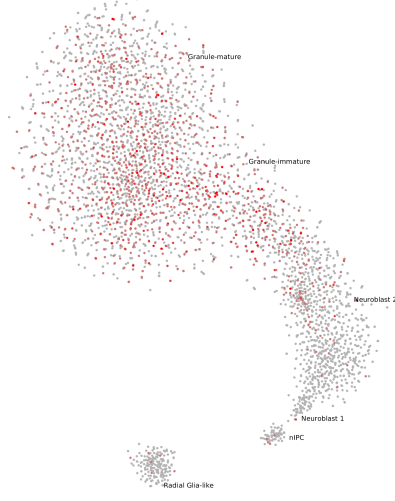

Wnt/Ca<sup>2+</sup> signaling

CamKIIa

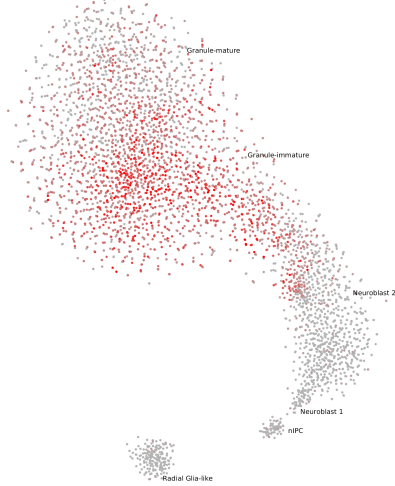

Ppp3ca

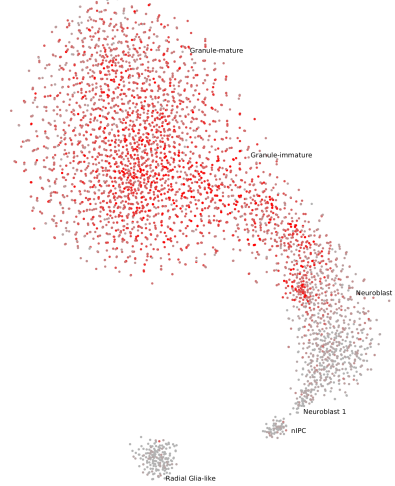

Ppp3r1

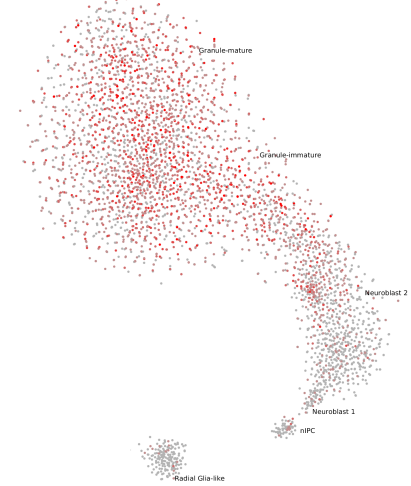

## Wnt signaling ligands

Wnt3

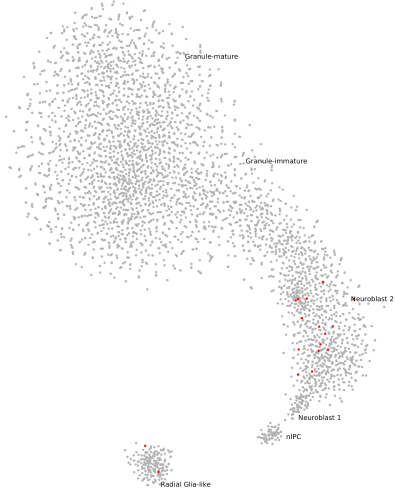

Wnt5a

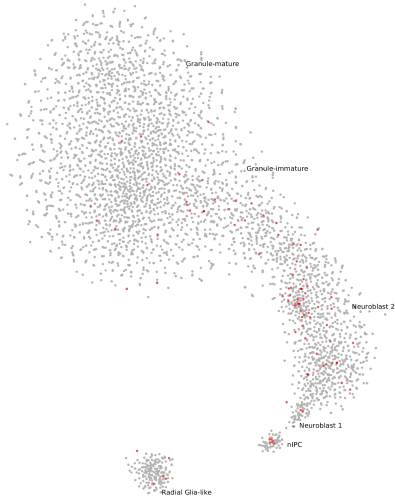

Wnt7a

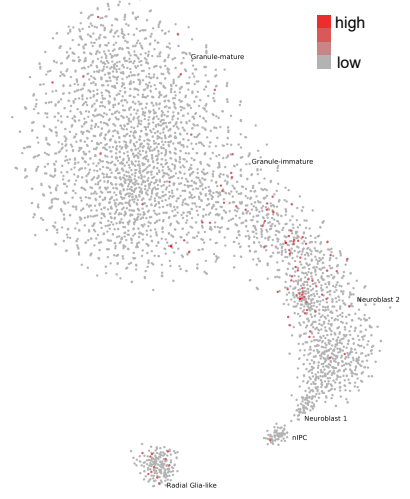

Wnt7b

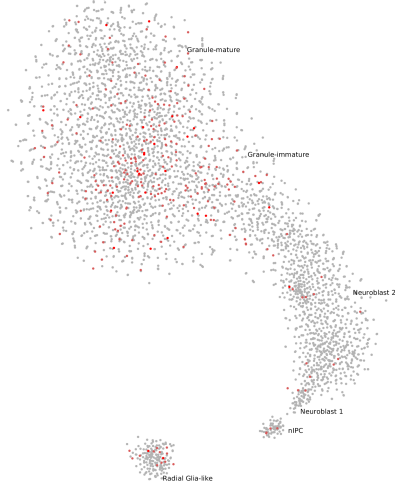

Wnt9a

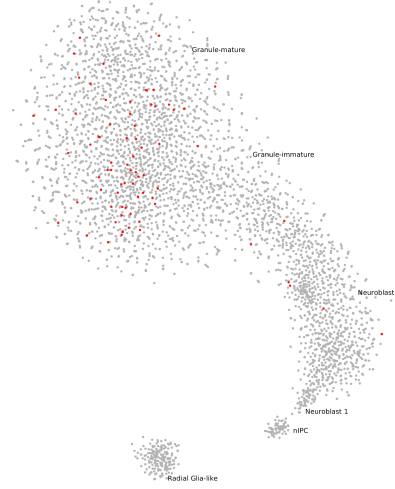

Wnt10a

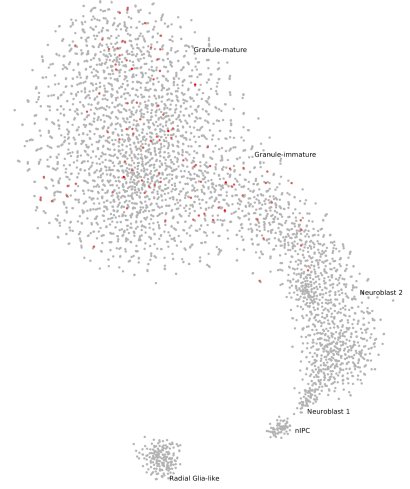

## Wnt signaling inhibitors

Sfrp1

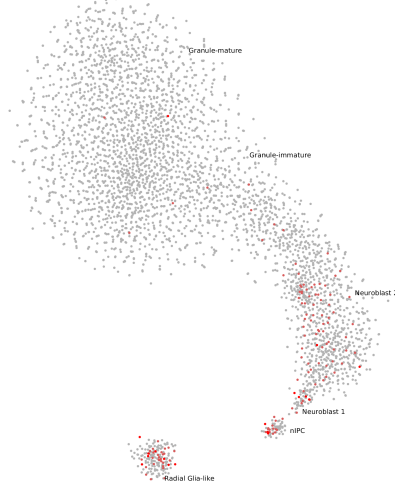

Dkk3

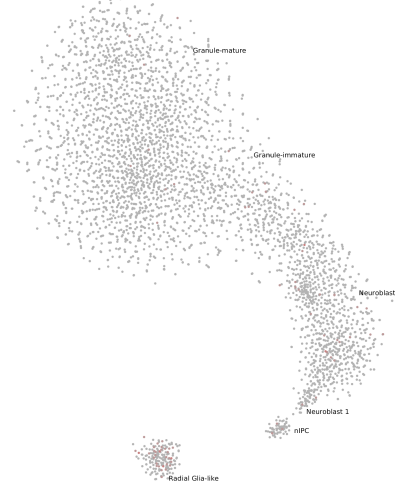

## Wnt signaling receptors

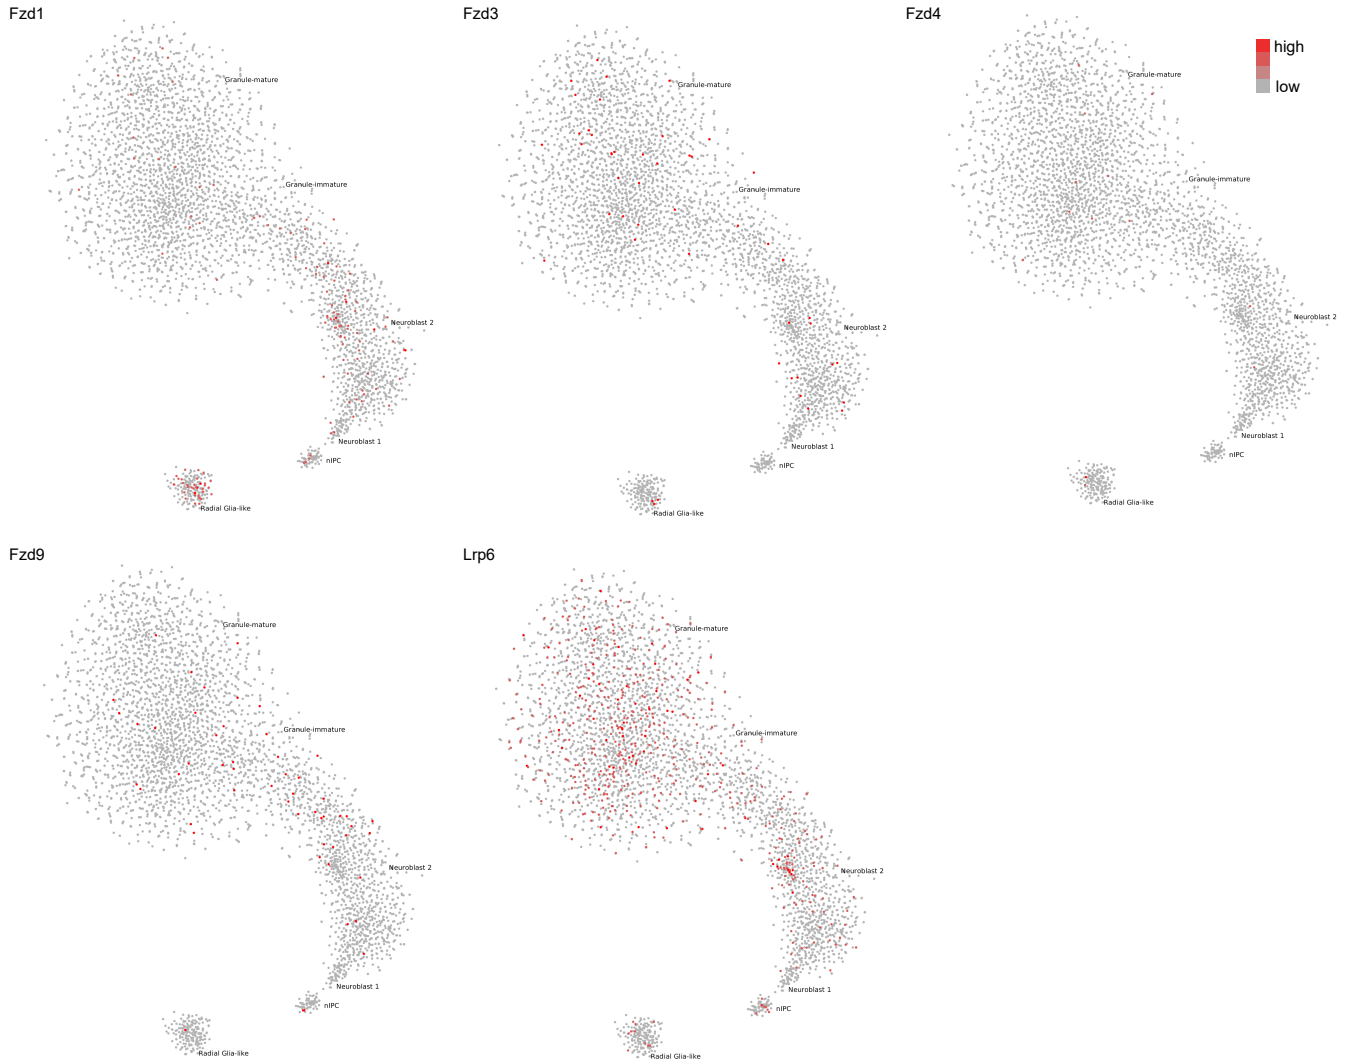

## B

Rspo2

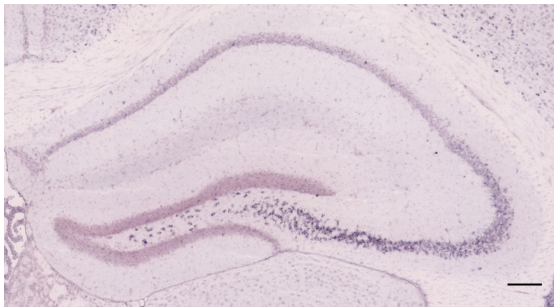

Wnt7b

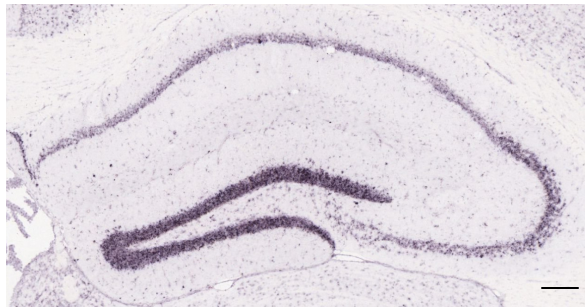

### Appendix Fig. S1 Potential regulators of canonical Wnt signaling during adult neurogenesis

**A** tSNE visualizations of genes associated with Wnt/ $\beta$ -catenin signaling, Wnt/PCP signaling, Wnt/Ca<sup>2+</sup> signaling and Wnt signaling ligands, inhibitors and receptors that display a stage specific expression along the neurogenic lineage. Cells are stained for expression of consecutive genes: grey - low expression, red - high expression. Data set: single cell RNA-sequencing of 5454 cells of the murine DG of mice from Postnatal Day 12 to Postnatal Day 35. (Hochgerner et al, 2018)

**B** Representative images of in situ hybridizations of Rspo2 (Wnt signaling modulator; <http://mouse.brain-map.org/gene/show/88569>) and Wnt7b (Wnt ligand, <http://mouse.brain-map.org/gene/show/22179>) in the hippocampus of adult mice (P56) from the Allen brain atlas (© 2015 Allen Institute for Brain Science. Allen Brain Atlas API. Available from: [brain-map.org/api/index.html](http://brain-map.org/api/index.html)). Scale bar= 200 $\mu$ m.
